# Supplementary material for: Microwave-assisted sonochemical synthesis of Cu and Mn doped GSH–ZnS polypeptide quantum dots and their enhanced photoelectrochemical properties
Source: Royal Society of Chemistry journal article supplement (doi:10.1039/c6ra22634e), 2016-01-01
Supplement: c6ra22634e1.pdf [file c6ra22634e1.pdf]

## Electronic Supporting Information (ESI)

### Microwave-assisted Sonochemical Synthesis of Cu and Mn Doped GSH-ZnS Polypeptides Quantum Dots and its Enhanced Photoelectrochemical Properties

Jian-Jun Shi<sup>a,b</sup>\*, Lei Gong<sup>a</sup>, Yan-Hong Zhang<sup>a</sup>, Ping Yang<sup>a</sup>, Jie He<sup>a</sup>

<sup>a</sup> School of Chemical Engineering, Anhui University of Science and Technology, Huainan, 232001, China

<sup>b</sup> State Key Laboratory of Analytical Chemistry for Life Science, Collaborative Innovation Center of Chemistry for Life Sciences, School of Chemistry and Chemical Engineering, Nanjing University, Nanjing, 210093, People's Republic of China

Corresponding author. Tel. / Fax: +86 554 6668485; E-mail: [jjshi@aust.edu.cn](mailto:jjshi@aust.edu.cn).

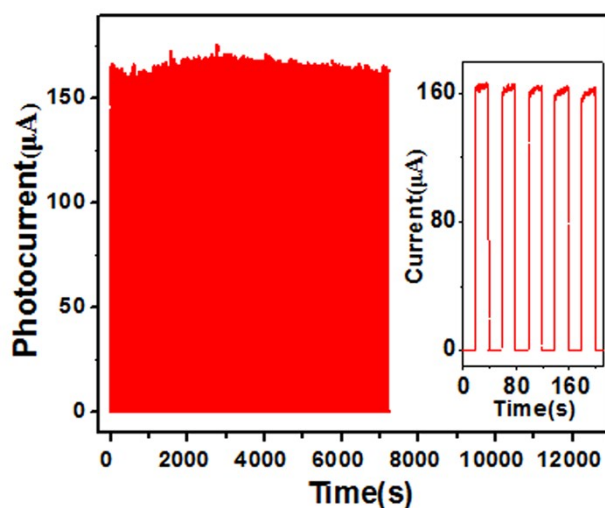

**Fig. S1.** The stability of ITO/TiO<sub>2</sub>/GSH-Cu<sub>0.05</sub>MnZnS in 0.1 M PBS (pH 7.4) containing 0.1M ascorbic acid.

Inset: part of a large view of the figure.

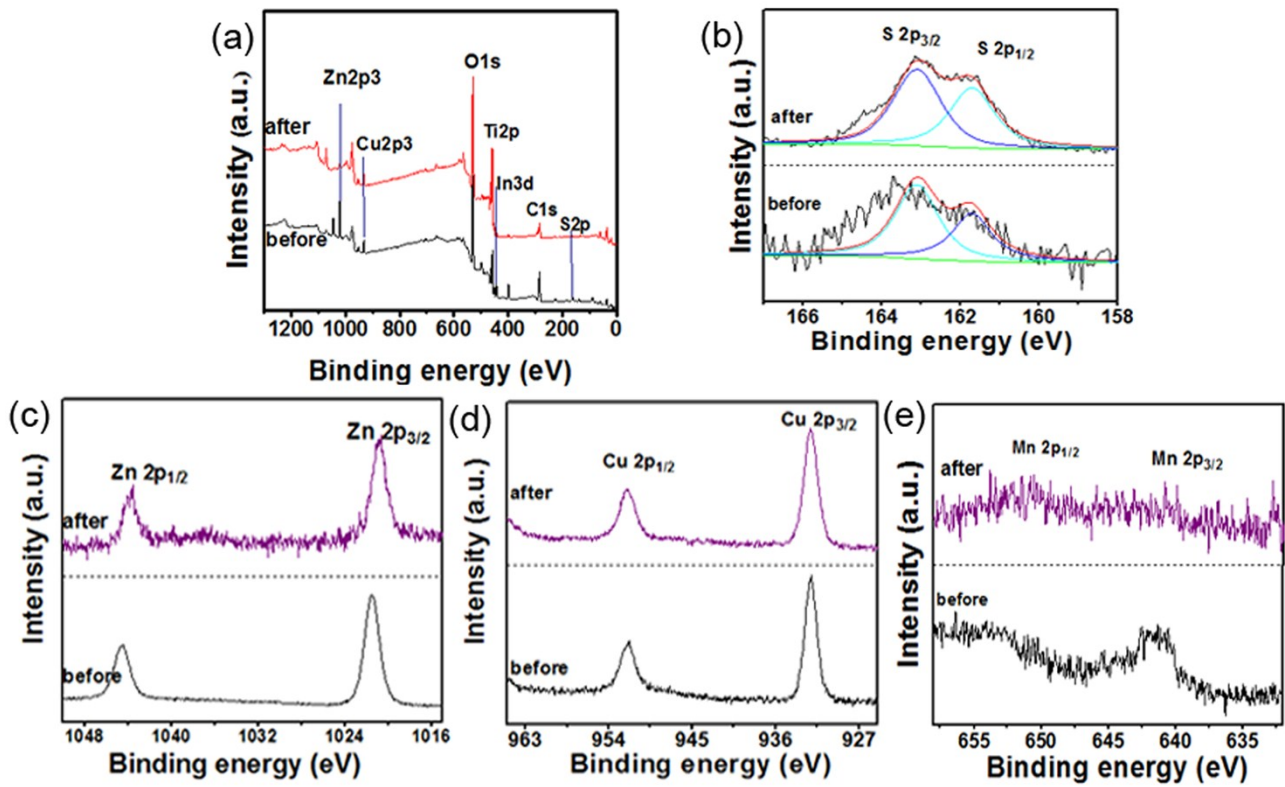

**Fig. S2.** (a) Survey spectra of ITO/TiO<sub>2</sub>/GSH-Cu<sub>0.05</sub>MnZnS before and after stability testing and high-resolution XPS spectra of (b) S (c) Zn (d) Cu and (e) Mn of ITO/TiO<sub>2</sub>/GSH-Cu<sub>0.05</sub>MnZnS before and after stability testing.
